# Supplementary material for: Novel reprogramming of neutrophils modulates inflammation resolution during atherosclerosis
Source: PubMed Central journal article supplement — Sci Adv. 2019 Feb 6;5(2):eaav2309. doi: 10.1126/sciadv.aav2309 (PMC6365109; doi:10.1126/sciadv.aav2309), 2019-02-06
Supplement: aav2309_SM.pdf [file aav2309_SM.pdf]

## Supplementary Materials for

### **Novel reprogramming of neutrophils modulates inflammation resolution during atherosclerosis**

Shuo Geng, Yao Zhang, Christina Lee, Liwu Li\*

\*Corresponding author. Email: lwli@vt.edu

Published 6 February 2019, *Sci. Adv.* **5**, eaav2309 (2019)

DOI: 10.1126/sciadv.aav2309

#### **This PDF file includes:**

- Fig. S1. Subclinical endotoxin up-regulates MPO level in HFD-fed mice.
- Fig. S2. Subclinical endotoxemia exacerbates atherosclerotic pathogenesis in RD-fed mice.
- Fig. S3. Subclinical endotoxin causes neutrophil expansion in atherosclerotic mice.
- Fig. S4. Subclinical endotoxin primes neutrophils into a proinflammatory state in atherosclerotic mice.
- Fig. S5. Subclinical endotoxin induces oxCAMKII elevation in vivo.
- Fig. S6. Neutrophils maintain viability after in vitro polarization.
- Fig. S7. Transfusion of superlow-dose LPS-polarized neutrophils elevates plasma lipid levels and modulates lesional macrophages.
- Fig. S8. Superlow-dose LPS and oxLDL treatment elevates ROS accumulation in neutrophils.
- Fig. S9. 4-PBA reverses superlow-dose LPS-induced differential regulation of miR-24 and miR-126 in neutrophils.
- Fig. S10. Transfusion of 4-PBA-polarized neutrophils down-regulates plasma lipid levels and reduces lesional macrophage activation.

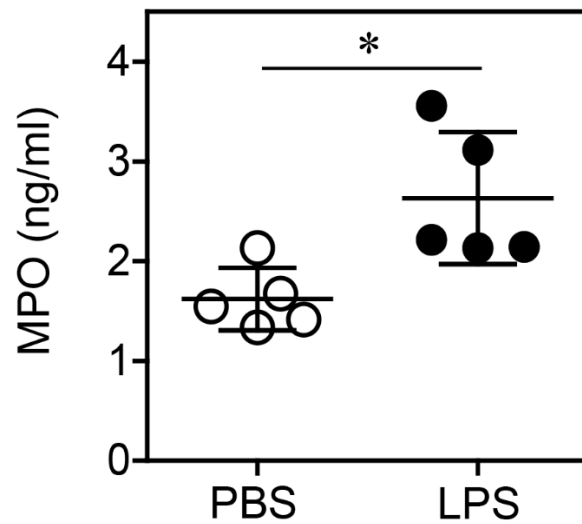

**Fig. S1. Subclinical endotoxin up-regulates MPO level in HFD-fed mice.** ApoE<sup>-/-</sup> mice were administrated with PBS or super-low-dose LPS together with HFD for 4 weeks. Circulating MPO level was determined by ELISA. Data are representative of two independent experiments, and error bars represent means  $\pm$  s.e.m. \* $P < 0.05$ ; Student's  $t$ -test ( $n = 5$  for each group).

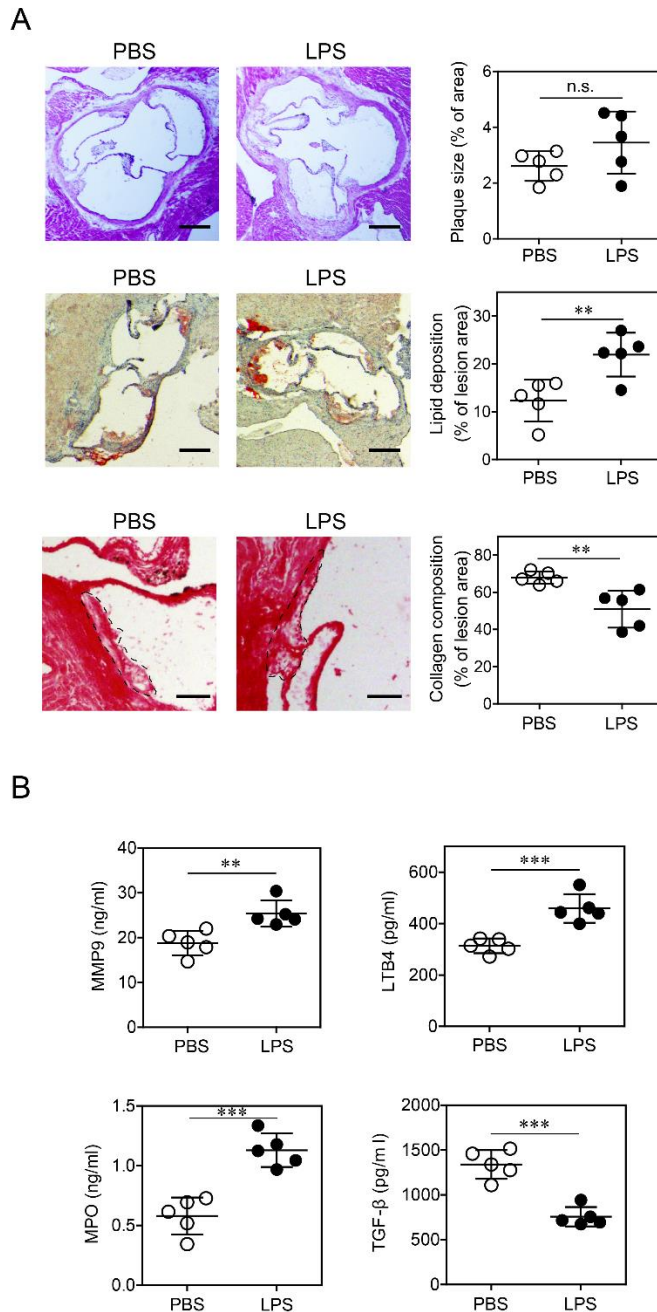

**Fig. S2. Subclinical endotoxemia exacerbates atherosclerotic pathogenesis in RD-fed mice.**

*ApoE*<sup>-/-</sup> mice were administrated with PBS or super-low-dose LPS together with RD for 4 weeks. **(A)** Representative images of HE-stained atherosclerotic lesions and quantification of plaque size demonstrated as the percentage of lesion area within aortic root area (upper panels).

Representative images of Oil Red O-stained atherosclerotic plaques and quantification of lipid deposition within lesion area (middle panels). Representative images of Picrosirius Red-stained atherosclerotic plaques and quantification of collagen content within lesion area (lower panels).

Scale bar, 300  $\mu$ m (upper and middle panels) and 100  $\mu$ m (lower panels). **(B)** The levels of circulating MMP9, LTB4, MPO and TGF- $\beta$  were determined by ELISA. Data are representative of two independent experiments, and error bars represent means  $\pm$  s.e.m. \*\**P* < 0.01 and \*\*\**P* < 0.001; Student's *t* test (*n* = 5 for each group).

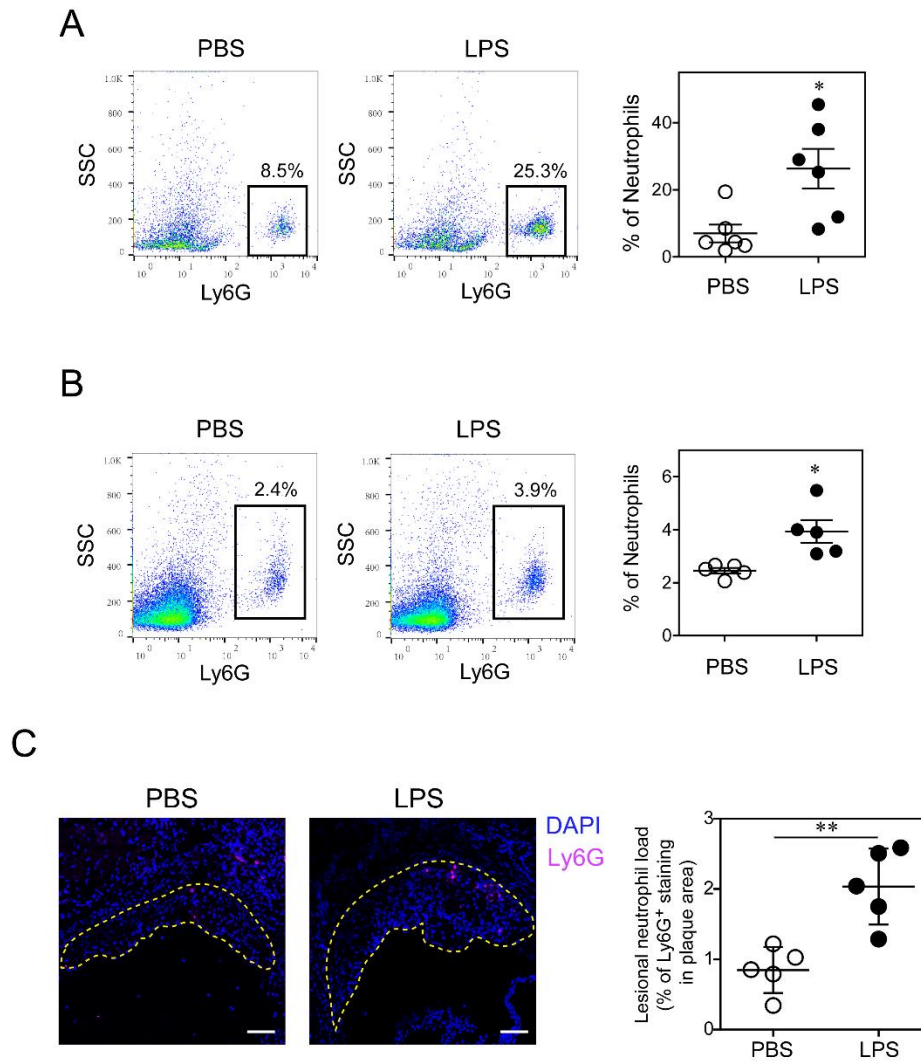

**Fig. S3. Subclinical endotoxin causes neutrophil expansion in atherosclerotic mice.** ApoE<sup>-/-</sup> mice were administrated with PBS or super-low-dose LPS together with HFD for 4 weeks. The frequency of Ly6G<sup>+</sup> neutrophils in the peripheral blood (**A**) and spleen (**B**) was analyzed with flow cytometry. (**C**) Representative confocal images and quantification of Ly6G<sup>+</sup> neutrophils in atherosclerotic plaques. Scale bar, 100  $\mu$ m. Data are representative of two independent experiments, and error bars represent means  $\pm$  s.e.m. \* $P < 0.05$  and \*\* $P < 0.01$ ; Student's t-test (n= 5 to 6 for each group).

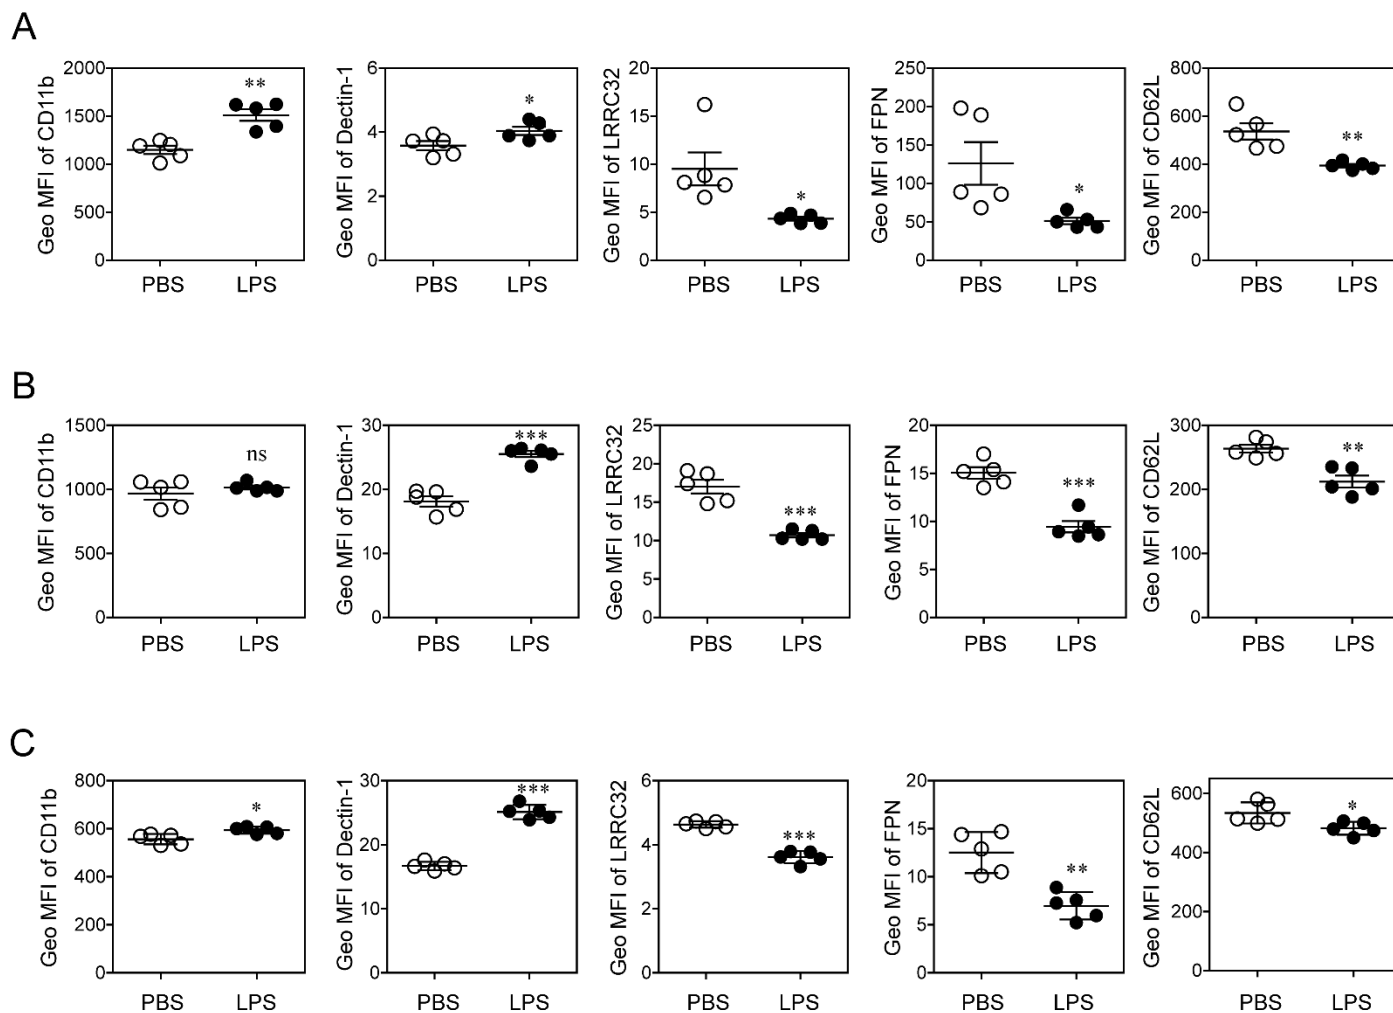

**Fig. S4. Subclinical endotoxin primes neutrophils into a proinflammatory state in atherosclerotic mice.** ApoE<sup>-/-</sup> mice were administrated with PBS or super-low-dose LPS together with HFD for 4 weeks. The surface phenotypes of Ly6G<sup>+</sup> neutrophils in the peripheral blood (A) spleen (B) and bone marrow (C) were analyzed by flow cytometry. The same data shown in Fig. 2 were re-analyzed with geometric mean fluorescence intensity (Geo MFI) as the parameter. Error bars represent means  $\pm$  s.e.m. \* $P < 0.05$ , \*\* $P < 0.01$  and \*\*\* $P < 0.001$ ; Student's t-test ( $n = 5$  for each group).

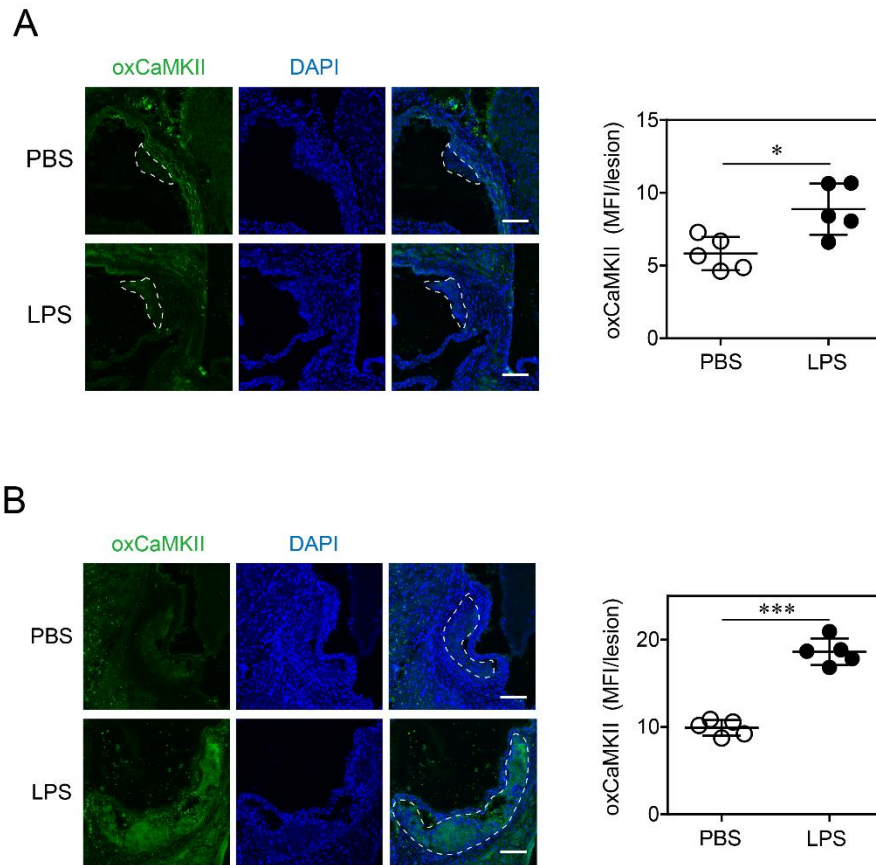

**Fig. S5. Subclinical endotoxin induces oxCaMKII elevation in vivo.** (A) ApoE<sup>-/-</sup> mice were administrated with PBS or super-low-dose LPS together with RD for 4 weeks. Representative confocal images and quantification of lesional oxCaMKII levels are displayed. (B) ApoE<sup>-/-</sup> mice were administrated with PBS or super-low-dose LPS together with HFD for 4 weeks. Representative confocal images and quantification of lesional oxCaMKII levels are displayed. Scale bar, 100  $\mu$ m. Data are representative of two independent experiments, and error bars represent means  $\pm$  s.e.m. \* $P$  < 0.05 and \*\*\* $P$  < 0.001; Student's t-test ( $n$  = 5 for each group).

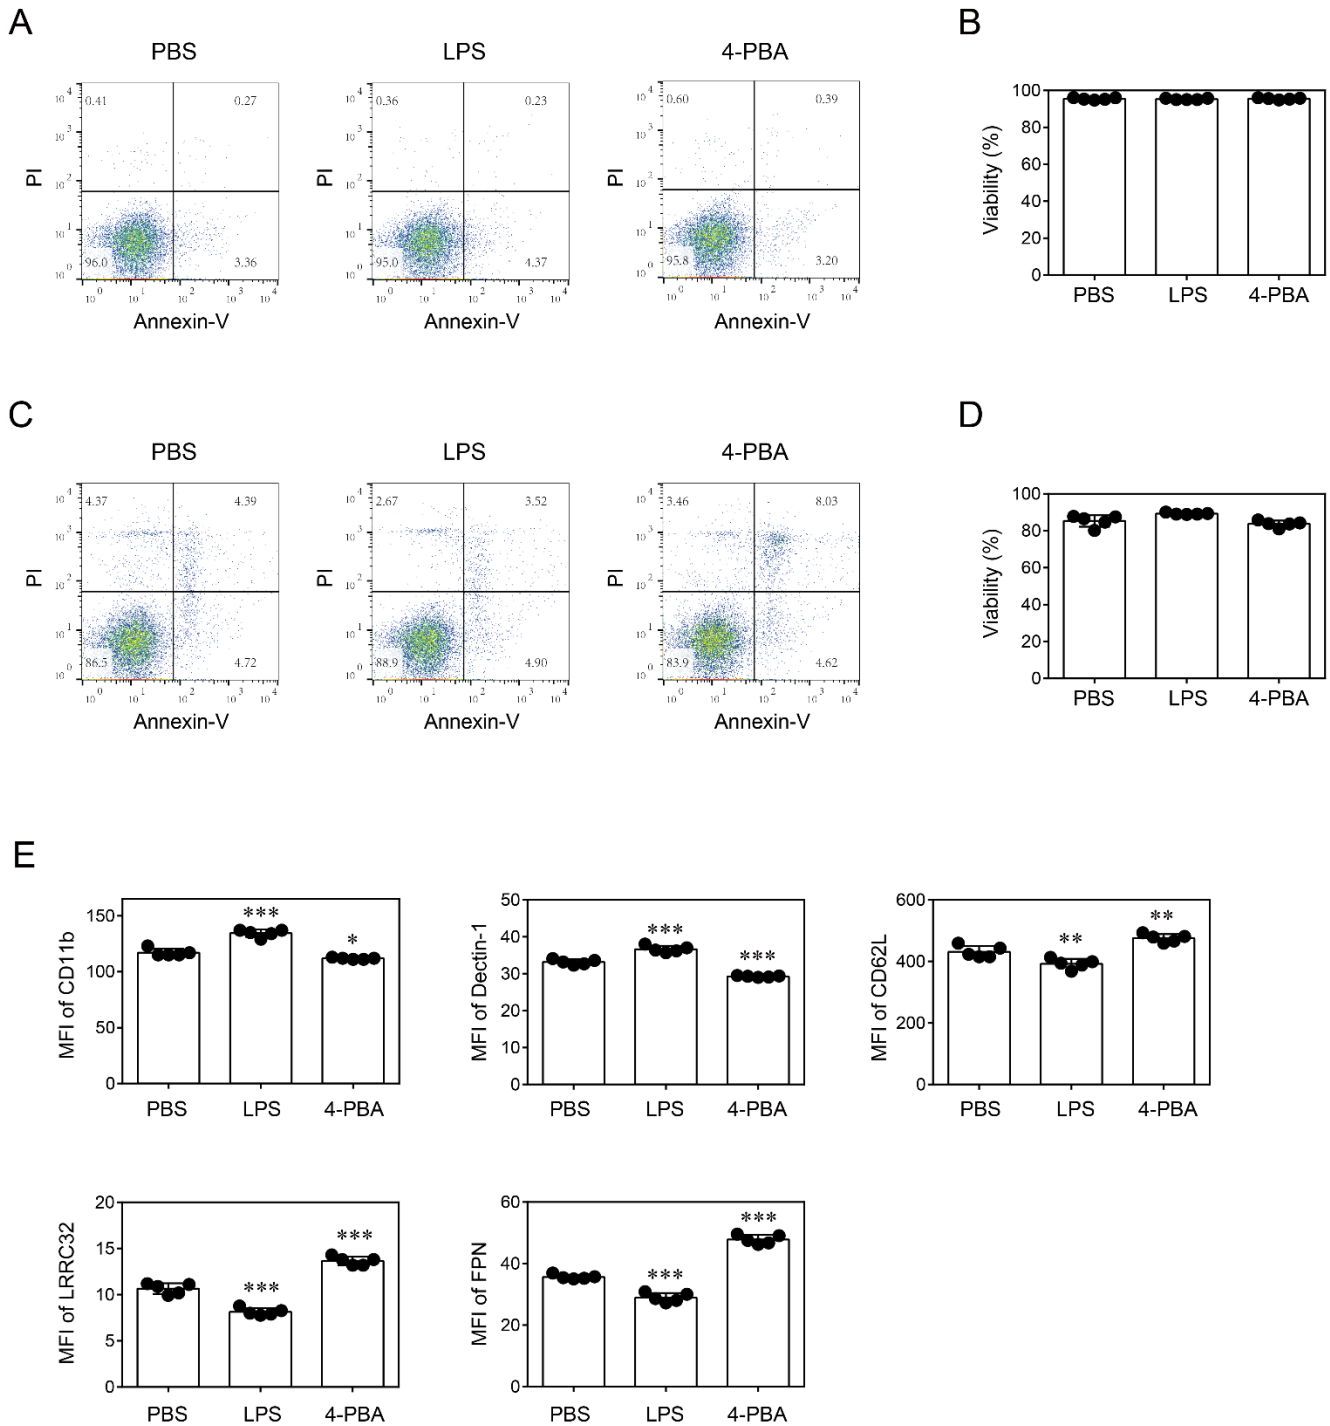

**Fig. S6. Neutrophils maintain viability after in vitro polarization.** Bone marrow neutrophils were purified and treated with PBS, super-low-dose LPS (100 pg/ml) or 4-PBA (1 mM) for 24 h (**A, B**) and 48 h (**C, D**). The cells were stained with Annexin-V and PI, and the viability (percentage of Annexin-V<sup>-</sup>/PI<sup>-</sup> population) was determined by flow cytometry. (**E**) Surface phenotype of neutrophils was analyzed by flow cytometry after polarization for 24 h. Data are representative of three independent experiments, and error bars represent means  $\pm$  s.e.m. \* $P < 0.05$ , \*\* $P < 0.01$  and \*\*\* $P < 0.001$  as compared with PBS group; one-way ANOVA. (n = 5 for each group).

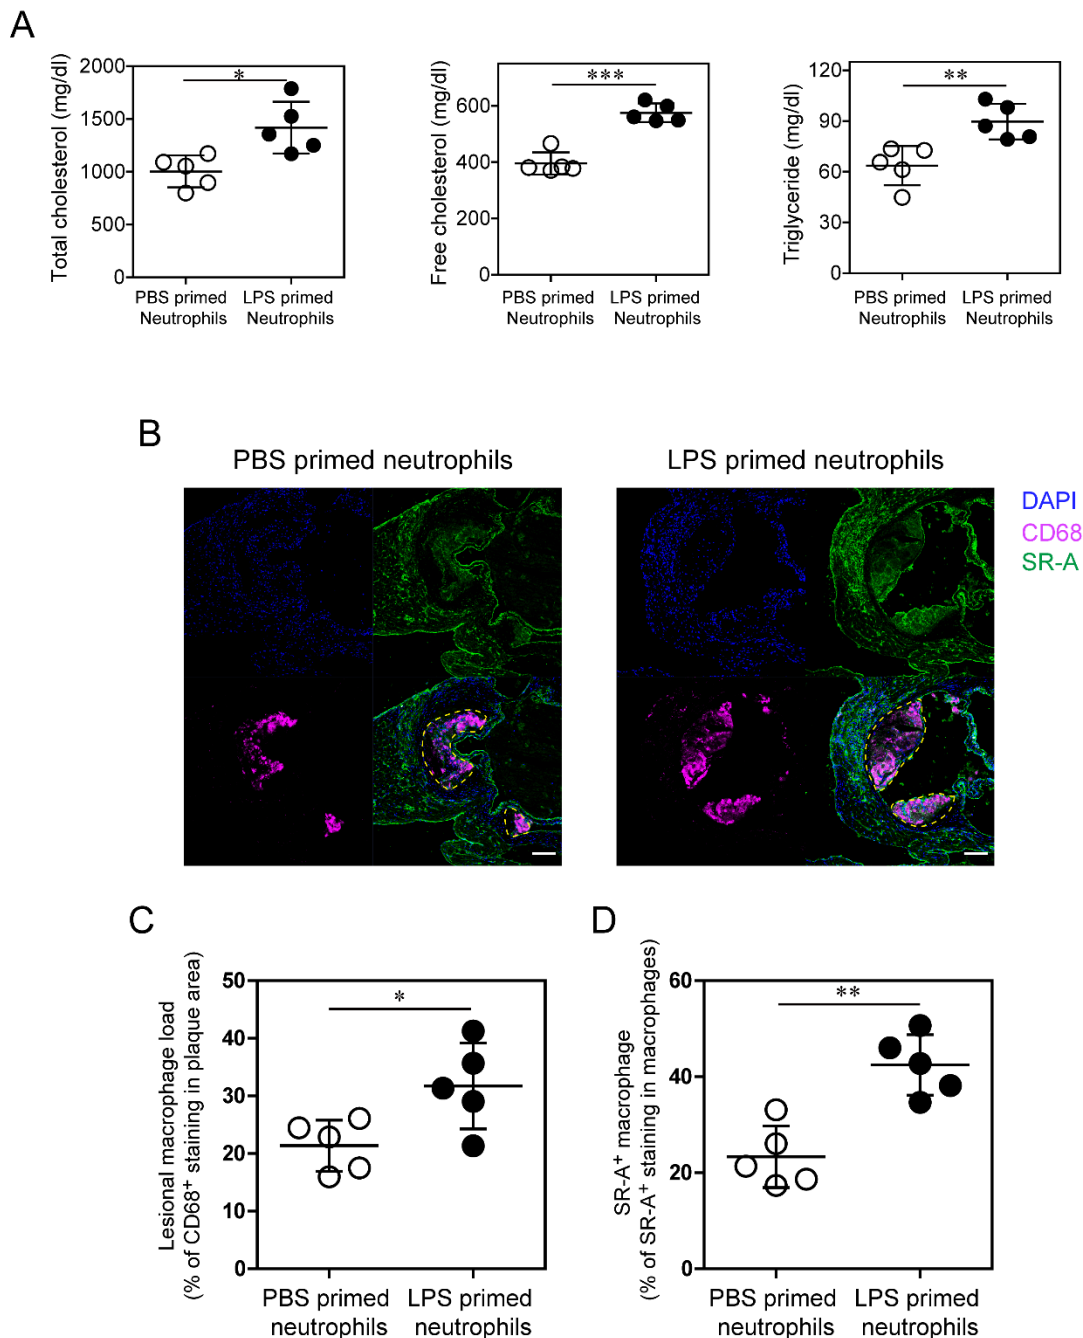

**Fig. S7. Transfusion of superlow-dose LPS-polarized neutrophils elevates plasma lipid levels and modulates lesional macrophages.** Neutrophils purified from ApoE<sup>-/-</sup> mice were treated with PBS or super-low-dose LPS (100 pg/ml) for 24 h. PBS- or LPS-treated neutrophils ( $2 \times 10^6$  cells per mouse) were then adoptively transferred by intravenous injection to HFD-fed ApoE<sup>-/-</sup> mice once a week for 4 weeks. **(A)** Plasma samples were collected 1 week after the last neutrophil transfer, and the levels of total cholesterol, free cholesterol and triglycerides were determined. **(B)** Representative confocal images of CD68 and SR-A staining in atherosclerotic plaques. Scale bar, 100  $\mu$ m. **(C)** Quantification of CD68<sup>+</sup> macrophage load in plaques. **(D)** Quantification of the frequency of SR-A<sup>+</sup> staining within macrophage population. Data are representative of two independent experiments, and error bars represent means  $\pm$  s.e.m. \* $P < 0.05$ , \*\* $P < 0.01$  and \*\*\* $P < 0.001$ ; Student's  $t$ -test ( $n = 5$  for each group).



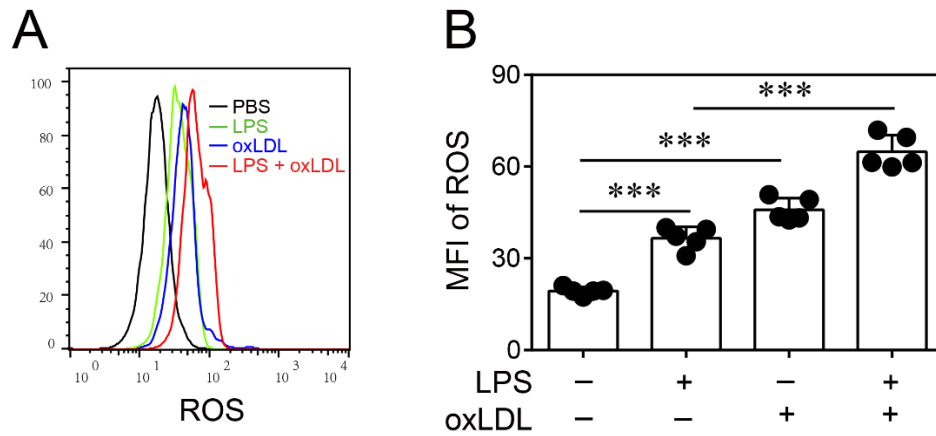

**Fig. S8. Superlow-dose LPS and oxLDL treatment elevates ROS accumulation in neutrophils.** Neutrophils were purified from the bone marrow of wild-type C57 BL/6 mice and treated with PBS, super-low dose LPS (100 pg/ml) and/or oxLDL (10  $\mu$ g/ml) for 2 d. **(A)** Representative histogram of ROS level determined by Cell ROX labeling. **(B)** Quantification of ROS level in neutrophils. Data are representative of three independent experiments, and error bars represent means  $\pm$  s.e.m. \*\*\* $P < 0.001$ ; ANOVA (n= 5 for each group).

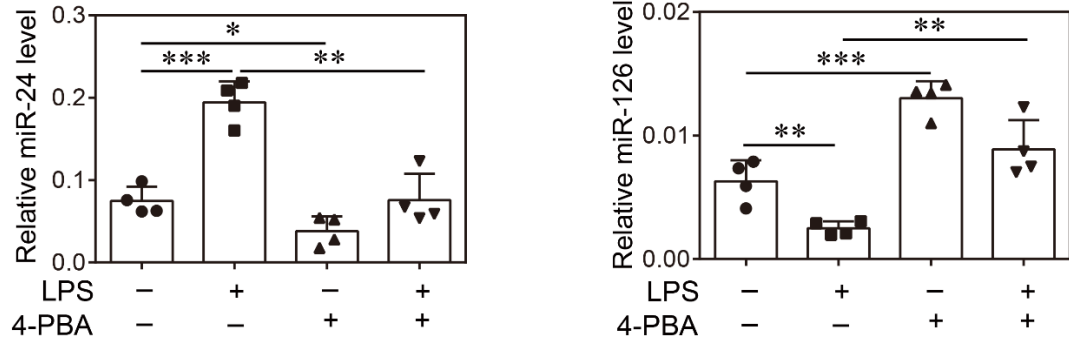

**Fig. S9. 4-PBA reverses superlow-dose LPS-induced differential regulation of miR-24 and miR-126 in neutrophils.** Neutrophils were purified from the bone marrow of wild-type C57 BL/6 mice and treated with PBS, super-low dose LPS (100 pg/ml) and/or 4-PBA (1 mM) for 2 d. The levels of miR-24 and miR-126 were determined by real-time RT-PCR. Data are representative of three independent experiments, and error bars represent means  $\pm$  s.e.m. \* $P$  < 0.05, \*\* $P$  < 0.01 and \*\*\* $P$  < 0.001; one-way ANOVA (n= 4 for each group).

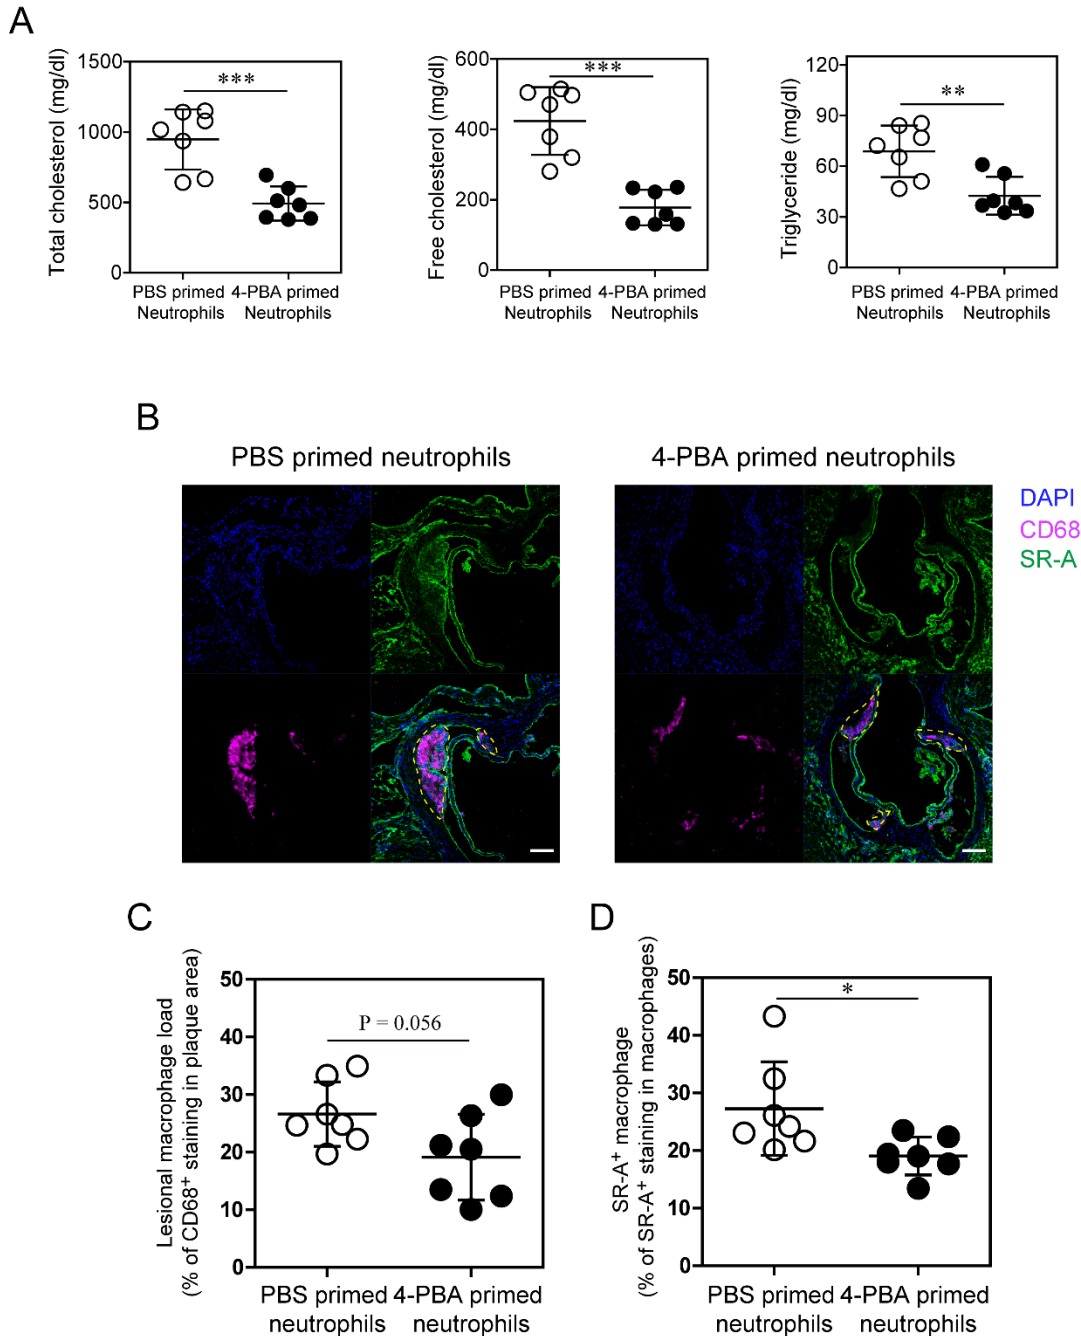

**Fig. S10. Transfusion of 4-PBA-polarized neutrophils down-regulates plasma lipid levels and reduces lesional macrophage activation.** Neutrophils purified from ApoE<sup>-/-</sup> mice were treated with PBS or 4-PBA (1 mM) for 24 h. PBS- or 4-PBA-treated neutrophils ( $2 \times 10^6$  cells per mouse) were then adoptively transferred by intravenous injection to HFD-fed ApoE<sup>-/-</sup> mice once a week for 4 weeks. **(A)** Plasma samples were collected 1 week after the last neutrophil transfer, and the levels of total cholesterol, free cholesterol and triglycerides were determined. **(B)** Representative confocal images of CD68 and SR-A staining in atherosclerotic plaques. Scale bar, 100  $\mu$ m. **(C)** Quantification of CD68<sup>+</sup> macrophage load in plaques. **(D)** Quantification of the frequency of SR-A<sup>+</sup> staining within macrophage population. Data are representative of two independent experiments, and error bars represent means  $\pm$  s.e.m. \* $P < 0.05$ , \*\* $P < 0.01$  and \*\*\* $P < 0.001$ ; Student's  $t$ -test ( $n = 7$  for each group).
